# Supplementary material for: Parental Preconception and Pre-Hatch Exposure to a Developmental Insult Alters Offspring’s Gene Expression and Epigenetic Regulations: An Avian Model
Source: MDPI journal article supplement (doi:10.3390/ijms24055047), 2023-03-06
Supplement: s1 [file s1]

## **Supplementary data 1**

**Figure S1.** Amplification plot of CHDW gene in male (a) and female (b) samples

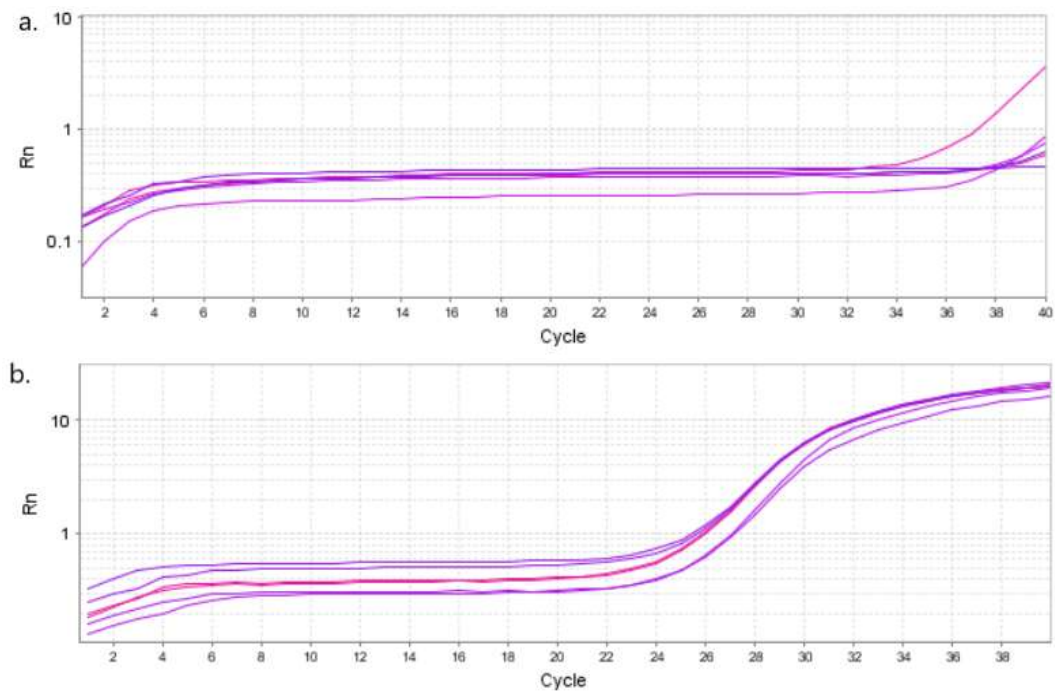

Real-time PCR amplification plot for CHDW gene, showing the normalized reporter (Rn) plotted versus cycle number (Cycle). CHDW gene expression was undetected in male samples ( $Ct > 35$ ) while being distinctly detected in female samples ( $Ct < 25$ ).
