# Supplementary material for: Parental Preconception and Pre-Hatch Exposure to a Developmental Insult Alters Offspring’s Gene Expression and Epigenetic Regulations: An Avian Model
Source: Int J Mol Sci. 2023 Mar 6;24(5):5047. doi: 10.3390/ijms24055047 (PMC10003510; doi:10.3390/ijms24055047)
Supplement: Supplementary file 1 [file ijms-24-05047-s001.zip]

Archive with 5 entries (5 files):
- Supp. S1 - Amplification plot of CHDW.pdf
- Supp. S2 - Control Correlation Matrix.xlsx
- Supp. S3 - Paternal Correlation Matrix.xlsx
- Supp. S4 - Maternal Correlation Matrix.xlsx
- Supp. S5 - Pre-hatch Correlation Matrix.xlsx
