# Supplementary material for: Parental Preconception and Pre-Hatch Exposure to a Developmental Insult Alters Offspring’s Gene Expression and Epigenetic Regulations: An Avian Model
Source: Int J Mol Sci. 2023 Mar 6;24(5):5047. doi: 10.3390/ijms24055047 (PMC10003510; doi:10.3390/ijms24055047)
Supplement: Supplementary file 1 [file ijms-24-05047-s001.zip › Supp. S2 - Control Correlation Matrix.xlsx]

## Sheet: R - value
								Control - Spearman's correlation matrix R values
	PKCb	DCX	FOS	MBD2	MBD3	MeCP2	SETDB1	SETDB2	CHRM2	CHRM3	SLC18A3	SLC6A4	CREB	REST	BDNF	miR-221	miR-6612	miR-29a	miR-10a
PKCb	1	0.472624	0.076634	0.349716	0.0913583	0.377861	0.149091	0.22596	0.31219	0.276637	0.210394	0.206943	-0.268769	-0.0482525	-0.462696	0.57261	0.383022	0.572253	0.424662
DCX	0.472624	1	0.00151316	0.274947	0.21376	0.679274	0.42291	0.2588	0.235388	0.128922	0.242495	0.161882	-0.0756353	-0.137423	-0.0342176	0.230136	0.374155	0.176357	0.374715
FOS	0.076634	0.00151316	1	0.379463	-0.062346	0.187977	0.178309	0.471917	0.174766	0.32406	0.273927	0.130851	0.211615	0.346475	0.133579	0.0177405	0.0806614	-0.00130577	0.0554654
MBD2	0.349716	0.274947	0.379463	1	0.334003	0.453234	0.258987	0.12578	0.192879	0.144828	0.166013	-0.242755	-0.0310445	-0.0763405	-0.160382	-0.0273294	0.398487	0.00712524	0.39939
MBD3	0.0913583	0.21376	-0.062346	0.334003	1	0.256556	-0.143491	-0.320181	0.396856	-0.0710814	0.300871	-0.20242	-0.224201	-0.311563	-0.166499	-0.022646	-0.0435546	-0.0192284	0.126445
MeCP2	0.377861	0.679274	0.187977	0.453234	0.256556	1	0.336148	0.226278	0.224879	0.153101	0.397275	0.176913	-0.0245058	-0.0783048	-0.125741	0.0565261	0.582753	0.288682	0.612568
SETDB1	0.149091	0.42291	0.178309	0.258987	-0.143491	0.336148	1	0.465079	0.368916	0.296935	0.22493	0.0333945	0.29188	0.239223	0.224919	0.136503	0.508757	0.31886	-0.0122031
SETDB2	0.22596	0.2588	0.471917	0.12578	-0.320181	0.226278	0.465079	1	0.121891	0.22291	0.125184	0.346678	0.0664119	0.071718	0.138543	0.283894	0.118801	0.501986	-0.0810282
CHRM2	0.31219	0.235388	0.174766	0.192879	0.396856	0.224879	0.368916	0.121891	1	0.357657	0.240629	8.10701e-05	-0.0292365	-0.0482106	-0.0385049	0.295146	0.150855	0.079117	-0.0789209
CHRM3	0.276637	0.128922	0.32406	0.144828	-0.0710814	0.153101	0.296935	0.22291	0.357657	1	0.192411	0.0317214	0.0120785	0.108614	0.218532	0.287889	0.18428	-0.0273593	0.370094
SLC18A3	0.210394	0.242495	0.273927	0.166013	0.300871	0.397275	0.22493	0.125184	0.240629	0.192411	1	0.00573791	0.126464	0.00811001	-0.113625	-0.152224	0.231177	0.227986	0.310669
SLC6A4	0.206943	0.161882	0.130851	-0.242755	-0.20242	0.176913	0.0333945	0.346678	8.10701e-05	0.0317214	0.00573791	1	0.0423947	0.361174	-0.213183	0.0650488	0.0357085	0.101434	-0.0418349
CREB	-0.268769	-0.0756353	0.211615	-0.0310445	-0.224201	-0.0245058	0.29188	0.0664119	-0.0292365	0.0120785	0.126464	0.0423947	1	0.537648	0.260582	0.107306	0.298733	-0.217675	0.0018514
REST	-0.0482525	-0.137423	0.346475	-0.0763405	-0.311563	-0.0783048	0.239223	0.071718	-0.0482106	0.108614	0.00811001	0.361174	0.537648	1	0.244908	0.143819	0.0299573	-0.365953	-0.108832
BDNF	-0.462696	-0.0342176	0.133579	-0.160382	-0.166499	-0.125741	0.224919	0.138543	-0.0385049	0.218532	-0.113625	-0.213183	0.260582	0.244908	1	-0.0104261	-0.120929	-0.1345	-0.154559
miR-221	0.57261	0.230136	0.0177405	-0.0273294	-0.022646	0.0565261	0.136503	0.283894	0.295146	0.287889	-0.152224	0.0650488	0.107306	0.143819	-0.0104261	1	0.113755	0.463218	0.128031
miR-6612	0.383022	0.374155	0.0806614	0.398487	-0.0435546	0.582753	0.508757	0.118801	0.150855	0.18428	0.231177	0.0357085	0.298733	0.0299573	-0.120929	0.113755	1	0.381651	0.584041
miR-29a	0.572253	0.176357	-0.00130577	0.00712524	-0.0192284	0.288682	0.31886	0.501986	0.079117	-0.0273593	0.227986	0.101434	-0.217675	-0.365953	-0.1345	0.463218	0.381651	1	0.180288
miR-10a	0.424662	0.374715	0.0554654	0.39939	0.126445	0.612568	-0.0122031	-0.0810282	-0.0789209	0.370094	0.310669	-0.0418349	0.0018514	-0.108832	-0.154559	0.128031	0.584041	0.180288	1

## Sheet: p - value
								Control - Spearman's correlation matrix p values
	PKCb	DCX	FOS	MBD2	MBD3	MeCP2	SETDB1	SETDB2	CHRM2	CHRM3	SLC18A3	SLC6A4	CREB	REST	BDNF	miR-221	miR-6612	miR-29a	miR-10a
PKCb		0.00547954	0.676771	0.0497583	0.624996	0.0361005	0.400045	0.213673	0.0722563	0.125345	0.232348	0.272537	0.136904	0.793129	0.00876841	0.000761842	0.0304818	0.00279787	0.0550045
DCX	0.00547954		0.993554	0.134405	0.248229	2.64879e-05	0.0142047	0.159782	0.187277	0.48944	0.173921	0.401485	0.685923	0.460998	0.85754	0.22116	0.0381169	0.399071	0.0942024
FOS	0.676771	0.993554		0.0352555	0.747992	0.328815	0.328869	0.00735597	0.338727	0.0806336	0.12924	0.506886	0.261613	0.0607024	0.48161	0.927222	0.666212	0.995169	0.811265
MBD2	0.0497583	0.134405	0.0352555		0.0574754	0.0104497	0.133018	0.471547	0.266951	0.421312	0.340534	0.180662	0.861638	0.667839	0.380565	0.881968	0.019582	0.971295	0.0531759
MBD3	0.624996	0.248229	0.747992	0.0574754		0.156363	0.418174	0.0692885	0.022215	0.699061	0.0837973	0.266545	0.202413	0.0728607	0.37068	0.902088	0.809812	0.921136	0.556028
MeCP2	0.0361005	2.64879e-05	0.328815	0.0104497	0.156363		0.0557941	0.220936	0.208316	0.410925	0.0220615	0.358584	0.89589	0.675428	0.515734	0.766705	0.000581602	0.144192	0.00146255
SETDB1	0.400045	0.0142047	0.328869	0.133018	0.418174	0.0557941		0.00426305	0.0268196	0.078638	0.180745	0.851276	0.0888784	0.166341	0.208234	0.441429	0.00180338	0.0981645	0.954869
SETDB2	0.213673	0.159782	0.00735597	0.471547	0.0692885	0.220936	0.00426305		0.485466	0.205093	0.473666	0.0480981	0.70902	0.686902	0.441953	0.115338	0.49668	0.00763015	0.706631
CHRM2	0.0722563	0.187277	0.338727	0.266951	0.022215	0.208316	0.0268196	0.485466		0.0171459	0.107205	0.999593	0.857873	0.764691	0.813517	0.0610155	0.340274	0.651432	0.673014
CHRM3	0.125345	0.48944	0.0806336	0.421312	0.699061	0.410925	0.078638	0.205093	0.0171459		0.195068	0.838033	0.939484	0.488125	0.164413	0.0612021	0.236824	0.874148	0.0404299
SLC18A3	0.232348	0.173921	0.12924	0.340534	0.0837973	0.0220615	0.180745	0.473666	0.107205	0.195068		0.969811	0.419037	0.958331	0.413309	0.323918	0.0925853	0.132002	0.0425965
SLC6A4	0.272537	0.401485	0.506886	0.180662	0.266545	0.358584	0.851276	0.0480981	0.999593	0.838033	0.969811		0.792411	0.0173348	0.180809	0.686166	0.822364	0.544541	0.820161
CREB	0.136904	0.685923	0.261613	0.861638	0.202413	0.89589	0.0888784	0.70902	0.857873	0.939484	0.419037	0.792411		0.000200813	0.104376	0.504275	0.061144	0.209065	0.992395
REST	0.793129	0.460998	0.0607024	0.667839	0.0728607	0.675428	0.166341	0.686902	0.764691	0.488125	0.958331	0.0173348	0.000200813		0.113454	0.351657	0.848763	0.0219556	0.546587
BDNF	0.00876841	0.85754	0.48161	0.380565	0.37068	0.515734	0.208234	0.441953	0.813517	0.164413	0.413309	0.180809	0.104376	0.113454		0.947095	0.379146	0.427389	0.305081
miR-221	0.000761842	0.22116	0.927222	0.881968	0.902088	0.766705	0.441429	0.115338	0.0610155	0.0612021	0.323918	0.686166	0.504275	0.351657	0.947095		0.467641	0.00340354	0.484977
miR-6612	0.0304818	0.0381169	0.666212	0.019582	0.809812	0.000581602	0.00180338	0.49668	0.340274	0.236824	0.0925853	0.822364	0.061144	0.848763	0.379146	0.467641		0.0180622	2.0351e-05
miR-29a	0.00279787	0.399071	0.995169	0.971295	0.921136	0.144192	0.0981645	0.00763015	0.651432	0.874148	0.132002	0.544541	0.209065	0.0219556	0.427389	0.00340354	0.0180622		0.315378
miR-10a	0.0550045	0.0942024	0.811265	0.0531759	0.556028	0.00146255	0.954869	0.706631	0.673014	0.0404299	0.0425965	0.820161	0.992395	0.546587	0.305081	0.484977	2.0351e-05	0.315378
