# Supplementary material for: Parental Preconception and Pre-Hatch Exposure to a Developmental Insult Alters Offspring’s Gene Expression and Epigenetic Regulations: An Avian Model
Source: Int J Mol Sci. 2023 Mar 6;24(5):5047. doi: 10.3390/ijms24055047 (PMC10003510; doi:10.3390/ijms24055047)
Supplement: Supplementary file 1 [file ijms-24-05047-s001.zip › Supp. S3 - Paternal Correlation Matrix.xlsx]

## Sheet: R - value
								Paternal - Spearman's correlation matrix R values
	PKCb	DCX	FOS	MBD2	MBD3	MeCP2	SETDB1	SETDB2	CHRM2	CHRM3	SLC18A3	SLC6A4	CREB	REST	BDNF	miR-221	miR-6612	miR-29a	miR-10a
PKCb	1	0.437829	0.0418503	0.541943	0.436124	0.610805	-0.461326	-0.160793	-0.348018	-0.535912	0.0868966	-0.104828	-0.128997	-0.102536	-0.143861	-0.232044	0.45184	-0.347371	0.147629
DCX	0.437829	1	0.0302614	0.365518	0.596974	0.460352	0.421053	0.456672	0.39604	0.253466	0.059537	0.369146	0.201542	0.256199	0.577934	-0.461963	0.311734	-0.272352	-0.197188
FOS	0.0418503	0.0302614	1	0.0840788	0.0357143	0.134048	-0.323789	-0.0732797	-0.278571	0.0596694	0.213657	-0.382839	-0.114388	0.160616	0.137363	0.103524	0.00275103	-0.0714286	0.270347
MBD2	0.541943	0.365518	0.0840788	1	0.741469	0.601345	-0.358328	-0.336265	-0.447228	-0.317118	-0.144438	-0.0945947	0.118925	-0.0804669	-0.0280236	-0.273599	-0.0663228	-0.42755	0.0473375
MBD3	0.436124	0.596974	0.0357143	0.741469	1	0.654959	-0.223773	0.0723514	-0.0764706	-0.241201	0.0547804	-0.0539877	-0.09482	-0.311467	0.053407	-0.529159	-0.225628	-0.276674	-0.328618
MeCP2	0.610805	0.460352	0.134048	0.601345	0.654959	1	-0.0951504	0.0909561	-0.294334	-0.0621119	-0.00413437	0.555785	-0.290167	-0.326615	-0.230816	-0.320639	0.130061	-0.161884	0.0759746
SETDB1	-0.461326	0.421053	-0.323789	-0.358328	-0.223773	-0.0951504	1	0.554054	0.799643	0.767479	0.0877839	0.593957	0.0630491	0.252916	0.209285	-0.296979	0.0338484	-0.130591	-0.0524763
SETDB2	-0.160793	0.456672	-0.0732797	-0.336265	0.0723514	0.0909561	0.554054	1	0.559428	0.373539	0.105651	0.358502	-0.110078	0.00981595	0.506637	-0.360825	-0.0618557	-0.103571	-0.158907
CHRM2	-0.348018	0.39604	-0.278571	-0.447228	-0.0764706	-0.294334	0.799643	0.559428	1	0.516609	0.547865	0.459339	0.00613121	0.220913	0.196429	-0.412676	0.137623	-0.0785714	-0.318066
CHRM3	-0.535912	0.253466	0.0596694	-0.317118	-0.241201	-0.0621119	0.767479	0.373539	0.516609	1	0.12636	0.658674	0.180739	0.468976	0.105781	-0.185846	0.116493	-0.101846	0.0438552
SLC18A3	0.0868966	0.059537	0.213657	-0.144438	0.0547804	-0.00413437	0.0877839	0.105651	0.547865	0.12636	1	0.177914	-0.188406	-0.0387797	-0.2623	-0.269042	-0.236865	-0.0779985	-0.237344
SLC6A4	-0.104828	0.369146	-0.382839	-0.0945947	-0.0539877	0.555785	0.593957	0.358502	0.459339	0.658674	0.177914	1	0.00103306	0.169429	-0.0810016	-0.420354	0.301915	-0.128035	0.0319239
CREB	-0.128997	0.201542	-0.114388	0.118925	-0.09482	-0.290167	0.0630491	-0.110078	0.00613121	0.180739	-0.188406	0.00103306	1	0.913483	0.511111	-0.372803	-0.223025	-0.566524	-0.212992
REST	-0.102536	0.256199	0.160616	-0.0804669	-0.311467	-0.326615	0.252916	0.00981595	0.220913	0.468976	-0.0387797	0.169429	0.913483	1	0.439264	-0.360172	0.091411	-0.622976	0.00309032
BDNF	-0.143861	0.577934	0.137363	-0.0280236	0.053407	-0.230816	0.209285	0.506637	0.196429	0.105781	-0.2623	-0.0810016	0.511111	0.439264	1	-0.272862	0.141439	-0.203753	-0.136733
miR-221	-0.232044	-0.461963	0.103524	-0.273599	-0.529159	-0.320639	-0.296979	-0.360825	-0.412676	-0.185846	-0.269042	-0.420354	-0.372803	-0.360172	-0.272862	1	-0.0618557	0.796809	0.167776
miR-6612	0.45184	0.311734	0.00275103	-0.0663228	-0.225628	0.130061	0.0338484	-0.0618557	0.137623	0.116493	-0.236865	0.301915	-0.223025	0.091411	0.141439	-0.0618557	1	0.0947275	0.647394
miR-29a	-0.347371	-0.272352	-0.0714286	-0.42755	-0.276674	-0.161884	-0.130591	-0.103571	-0.0785714	-0.101846	-0.0779985	-0.128035	-0.566524	-0.622976	-0.203753	0.796809	0.0947275	1	0.00179536
miR-10a	0.147629	-0.197188	0.270347	0.0473375	-0.328618	0.0759746	-0.0524763	-0.158907	-0.318066	0.0438552	-0.237344	0.0319239	-0.212992	0.00309032	-0.136733	0.167776	0.647394	0.00179536	1

## Sheet: p - value
								Paternal - Spearman's correlation matrix p values
	PKCb	DCX	FOS	MBD2	MBD3	MeCP2	SETDB1	SETDB2	CHRM2	CHRM3	SLC18A3	SLC6A4	CREB	REST	BDNF	miR-221	miR-6612	miR-29a	miR-10a
PKCb		0.15551	0.88836	0.0475622	0.119936	0.0225533	0.11339	0.580452	0.221475	0.0613679	0.775745	0.730877	0.656794	0.724587	0.653876	0.440933	0.141547	0.266877	0.645
DCX	0.15551		0.924365	0.217292	0.0341871	0.0988446	0.172556	0.11794	0.161055	0.398185	0.839019	0.213062	0.484746	0.395217	0.0525313	0.0972975	0.321685	0.365333	0.540083
FOS	0.88836	0.924365		0.764952	0.9031	0.631857	0.257	0.795041	0.31386	0.839738	0.460244	0.176431	0.682947	0.580603	0.656082	0.72364	0.996624	0.820724	0.36861
MBD2	0.0475622	0.217292	0.764952		0.000428909	0.00829531	0.157127	0.172455	0.0959084	0.21307	0.576834	0.715696	0.638351	0.756887	0.917928	0.302103	0.805935	0.112763	0.861004
MBD3	0.119936	0.0341871	0.9031	0.000428909		0.00317793	0.372058	0.775416	0.779765	0.334944	0.829074	0.836433	0.699405	0.208335	0.837436	0.0306554	0.381011	0.297191	0.196776
MeCP2	0.0225533	0.0988446	0.631857	0.00829531	0.00317793		0.713873	0.719643	0.266407	0.806583	0.98701	0.0166266	0.228171	0.185883	0.369523	0.207903	0.616139	0.546343	0.770271
SETDB1	0.11339	0.172556	0.257	0.157127	0.372058	0.713873		0.0226681	0.000574287	0.000200901	0.735257	0.0169872	0.803718	0.324413	0.433003	0.261317	0.901949	0.64058	0.845832
SETDB2	0.580452	0.11794	0.795041	0.172455	0.775416	0.719643	0.0226681		0.0323864	0.139253	0.683938	0.157021	0.663695	0.971275	0.0469286	0.169246	0.819269	0.714394	0.552846
CHRM2	0.221475	0.161055	0.31386	0.0959084	0.779765	0.266407	0.000574287	0.0323864		0.0424029	0.0300248	0.0864893	0.983115	0.408081	0.481895	0.11283	0.622652	0.782704	0.246251
CHRM3	0.0613679	0.398185	0.839738	0.21307	0.334944	0.806583	0.000200901	0.139253	0.0424029		0.617342	0.00495073	0.459015	0.0496129	0.684441	0.471621	0.654249	0.705958	0.866651
SLC18A3	0.775745	0.839019	0.460244	0.576834	0.829074	0.98701	0.735257	0.683938	0.0300248	0.617342		0.491359	0.439851	0.878577	0.17752	0.293557	0.243999	0.773421	0.243018
SLC6A4	0.730877	0.213062	0.176431	0.715696	0.836433	0.0166266	0.0169872	0.157021	0.0864893	0.00495073	0.491359		0.996754	0.512288	0.764681	0.105477	0.253658	0.634535	0.906514
CREB	0.656794	0.484746	0.682947	0.638351	0.699405	0.228171	0.803718	0.663695	0.983115	0.459015	0.439851	0.996754		4.7433e-08	0.0301757	0.127593	0.373699	0.0194259	0.396118
REST	0.724587	0.395217	0.580603	0.756887	0.208335	0.185883	0.324413	0.971275	0.408081	0.0496129	0.878577	0.512288	4.7433e-08		0.0788013	0.154904	0.724423	0.0114793	0.991476
BDNF	0.653876	0.0525313	0.656082	0.917928	0.837436	0.369523	0.433003	0.0469286	0.481895	0.684441	0.17752	0.764681	0.0301757	0.0788013		0.303541	0.481612	0.463253	0.487804
miR-221	0.440933	0.0972975	0.72364	0.302103	0.0306554	0.207903	0.261317	0.169246	0.11283	0.471621	0.293557	0.105477	0.127593	0.154904	0.303541		0.819275	0.000226452	0.530656
miR-6612	0.141547	0.321685	0.996624	0.805935	0.381011	0.616139	0.901949	0.819269	0.622652	0.654249	0.243999	0.253658	0.373699	0.724423	0.481612	0.819275		0.736072	0.000196239
miR-29a	0.266877	0.365333	0.820724	0.112763	0.297191	0.546343	0.64058	0.714394	0.782704	0.705958	0.773421	0.634535	0.0194259	0.0114793	0.463253	0.000226452	0.736072		0.997336
miR-10a	0.645	0.540083	0.36861	0.861004	0.196776	0.770271	0.845832	0.552846	0.246251	0.866651	0.243018	0.906514	0.396118	0.991476	0.487804	0.530656	0.000196239	0.997336
