# Supplementary material for: Parental Preconception and Pre-Hatch Exposure to a Developmental Insult Alters Offspring’s Gene Expression and Epigenetic Regulations: An Avian Model
Source: Int J Mol Sci. 2023 Mar 6;24(5):5047. doi: 10.3390/ijms24055047 (PMC10003510; doi:10.3390/ijms24055047)
Supplement: Supplementary file 1 [file ijms-24-05047-s001.zip › Supp. S4 - Maternal Correlation Matrix.xlsx]

## Sheet: R - value
								Maternal - Spearman's correlation matrix R values
	PKCb	BDNF	SLC18A3	MBD2	MBD3	MeCP2	SETDB1	SETDB2	CHRM2	CHRM3	DCX	FOS	SLC6A4	CREB	REST	miR-221	miR-6612	miR-29a	miR-10a
PKCb	1	0.620064	0.536585	-0.38906	0.358664	-0.0121951	0.329268	0.443771	0.468623	-0.47479	0.0981735	0.492403	0.277905	0.597715	0.561644	0.492029	-0.437692	-0.0136675	-0.612637
BDNF	0.620064	1	0.151976	-0.248485	0.260606	-0.0121581	-0.050114	0.0181818	-0.030303	0.00836827	0.0911164	-0.248485	-0.118182	0.532132	0.419135	0.927273	-0.6	-0.0636364	0.0357143
SLC18A3	0.536585	0.151976	1	0.0787879	0.620064	0.662617	0.52439	0.620064	0.716667	-0.569043	0.269406	0.684848	0.0956722	0.537944	0.671233	0.460138	0.10303	-0.288873	-0.333333
MBD2	-0.38906	-0.248485	0.0787879	1	0.0909091	0.515152	0.613985	0.624242	0.115152	0.474166	-0.487473	0.212121	0.209091	-0.678928	-0.523919	-0.0181818	0.878788	0.536364	0.428571
MBD3	0.358664	0.260606	0.620064	0.0909091	1	0.578589	0.0607906	0.187879	0.5	-0.133892	0.382689	0.0424242	-0.336364	0.183494	0.400912	0.318182	0.163636	-0.227273	-0.238095
MeCP2	-0.0121951	-0.0121581	0.662617	0.515152	0.578589	1	0.640244	0.620064	0.816667	-0.251048	-0.146119	0.188451	0.186789	-0.00919562	0.260274	0.273349	0.492403	0.0273349	0.0952381
SETDB1	0.329268	-0.050114	0.52439	0.613985	0.0607906	0.640244	1	0.879273	0.656538	-0.359836	-0.429224	0.717329	0.624147	-0.00919562	0.0890411	0.223235	0.413376	0.496584	-0.142857
SETDB2	0.443771	0.0181818	0.620064	0.624242	0.187879	0.620064	0.879273	1	0.709091	-0.225943	-0.35991	0.90303	0.463636	0.0275241	0.16401	0.236364	0.454545	0.527273	-0.428571
CHRM2	0.468623	-0.030303	0.716667	0.115152	0.5	0.816667	0.656538	0.709091	1	-0.661094	0.0972649	0.716667	0.321212	0.423345	0.480245	0.2	0.25	0.030303	-0.542857
CHRM3	-0.47479	0.00836827	-0.569043	0.474166	-0.133892	-0.251048	-0.359836	-0.225943	-0.661094	1	-0.32622	-0.602516	-0.237083	-0.769264	-0.579268	-0.158055	0.326363	0.674775	0.270281
DCX	0.0981735	0.0911164	0.269406	-0.487473	0.382689	-0.146119	-0.429224	-0.35991	0.0972649	-0.32622	1	-0.150342	-0.0805605	0.564382	0.487719	0.0280211	-0.510252	-0.739055	-0.550908
FOS	0.492403	-0.248485	0.684848	0.212121	0.0424242	0.188451	0.717329	0.90303	0.716667	-0.602516	-0.150342	1	0.445455	0.201843	0.0911164	-0.1	0.290909	0.0545455	-0.238095
SLC6A4	0.277905	-0.118182	0.0956722	0.209091	-0.336364	0.186789	0.624147	0.463636	0.321212	-0.237083	-0.0805605	0.445455	1	0.0774667	-0.0245184	-0.020979	0.0272727	0.195804	-0.119048
CREB	0.597715	0.532132	0.537944	-0.678928	0.183494	-0.00919562	-0.00919562	0.0275241	0.423345	-0.769264	0.564382	0.201843	0.0774667	1	0.8501	0.528182	-0.7615	-0.626776	-0.463553
REST	0.561644	0.419135	0.671233	-0.523919	0.400912	0.260274	0.0890411	0.16401	0.480245	-0.579268	0.487719	0.0911164	-0.0245184	0.8501	1	0.619966	-0.619592	-0.3993	-0.646718
miR-221	0.492029	0.927273	0.460138	-0.0181818	0.318182	0.273349	0.223235	0.236364	0.2	-0.158055	0.0280211	-0.1	-0.020979	0.528182	0.619966	1	-0.418182	-0.048951	0
miR-6612	-0.437692	-0.6	0.10303	0.878788	0.163636	0.492403	0.413376	0.454545	0.25	0.326363	-0.510252	0.290909	0.0272727	-0.7615	-0.619592	-0.418182	1	0.472727	0.333333
miR-29a	-0.0136675	-0.0636364	-0.288873	0.536364	-0.227273	0.0273349	0.496584	0.527273	0.030303	0.674775	-0.739055	0.0545455	0.195804	-0.626776	-0.3993	-0.048951	0.472727	1	-0.238095
miR-10a	-0.612637	0.0357143	-0.333333	0.428571	-0.238095	0.0952381	-0.142857	-0.428571	-0.542857	0.270281	-0.550908	-0.238095	-0.119048	-0.463553	-0.646718	0	0.333333	-0.238095	1

## Sheet: p - value
								Maternal - Spearman's correlation matrix p values
	PKCb	BDNF	SLC18A3	MBD2	MBD3	MeCP2	SETDB1	SETDB2	CHRM2	CHRM3	DCX	FOS	SLC6A4	CREB	REST	miR-221	miR-6612	miR-29a	miR-10a
PKCb		0.0613823	0.112933	0.265452	0.306333	0.977002	0.348092	0.198825	0.204123	0.195844	0.770961	0.150287	0.405382	0.0560316	0.0757659	0.126188	0.206629	0.973296	0.157937
BDNF	0.0613823		0.673998	0.491768	0.46973	0.980391	0.886801	0.967308	0.94597	0.991821	0.790499	0.491768	0.73453	0.0971356	0.198967	0.000127666	0.0734265	0.860333	0.963492
SLC18A3	0.112933	0.673998		0.838226	0.0610648	0.0415498	0.122679	0.0610902	0.0368662	0.115112	0.419007	0.0346517	0.780798	0.0911795	0.0274628	0.156	0.785023	0.275277	0.427877
MBD2	0.265452	0.491768	0.838226		0.811283	0.133401	0.0640256	0.0603158	0.758931	0.168602	0.130702	0.560276	0.539314	0.0256938	0.101545	0.967308	0.00159998	0.0939164	0.353571
MBD3	0.306333	0.46973	0.0610648	0.811283		0.0663167	0.871338	0.607316	0.177662	0.73157	0.244059	0.918376	0.313186	0.592462	0.220692	0.341517	0.656714	0.503396	0.582143
MeCP2	0.977002	0.980391	0.0415498	0.133401	0.0663167		0.0510637	0.0610902	0.0107694	0.512335	0.66556	0.599677	0.580615	0.984222	0.435018	0.412832	0.150379	0.939873	0.840129
SETDB1	0.348092	0.886801	0.122679	0.0640256	0.871338	0.0510637		0.000733826	0.0448192	0.339815	0.187127	0.0239683	0.0446183	0.984462	0.791638	0.506547	0.234875	0.122908	0.78254
SETDB2	0.198825	0.967308	0.0610902	0.0603158	0.607316	0.0610902	0.000733826		0.0267521	0.558422	0.275648	0.000807429	0.154576	0.94505	0.627516	0.485354	0.19124	0.100311	0.353571
CHRM2	0.204123	0.94597	0.0368662	0.758931	0.177662	0.0107694	0.0448192	0.0267521		0.0589286	0.791714	0.0368662	0.367892	0.22704	0.161592	0.583658	0.520635	0.94597	0.297222
CHRM3	0.195844	0.991821	0.115112	0.168602	0.73157	0.512335	0.339815	0.558422	0.0589286		0.352172	0.0920525	0.506588	0.0117345	0.083772	0.662929	0.390046	0.0369048	0.557937
DCX	0.770961	0.790499	0.419007	0.130702	0.244059	0.66556	0.187127	0.275648	0.791714	0.352172		0.658035	0.804493	0.059227	0.109408	0.933736	0.111353	0.00786557	0.163393
FOS	0.150287	0.491768	0.0346517	0.560276	0.918376	0.599677	0.0239683	0.000807429	0.0368662	0.0920525	0.658035		0.17304	0.554693	0.790322	0.775854	0.386337	0.881201	0.582143
SLC6A4	0.405382	0.73453	0.780798	0.539314	0.313186	0.580615	0.0446183	0.154576	0.367892	0.506588	0.804493	0.17304		0.816356	0.943197	0.95596	0.946204	0.543064	0.793006
CREB	0.0560316	0.0971356	0.0911795	0.0256938	0.592462	0.984222	0.984462	0.94505	0.22704	0.0117345	0.059227	0.554693	0.816356		0.000813943	0.081609	0.00864628	0.0330654	0.260417
REST	0.0757659	0.198967	0.0274628	0.101545	0.220692	0.435018	0.791638	0.627516	0.161592	0.083772	0.109408	0.790322	0.943197	0.000813943		0.035158	0.0462494	0.197771	0.0917659
miR-221	0.126188	0.000127666	0.156	0.967308	0.341517	0.412832	0.506547	0.485354	0.583658	0.662929	0.933736	0.775854	0.95596	0.081609	0.035158		0.203041	0.886134	1
miR-6612	0.206629	0.0734265	0.785023	0.00159998	0.656714	0.150379	0.234875	0.19124	0.520635	0.390046	0.111353	0.386337	0.946204	0.00864628	0.0462494	0.203041		0.145713	0.427877
miR-29a	0.973296	0.860333	0.275277	0.0939164	0.503396	0.939873	0.122908	0.100311	0.94597	0.0369048	0.00786557	0.881201	0.543064	0.0330654	0.197771	0.886134	0.145713		0.582143
miR-10a	0.157937	0.963492	0.427877	0.353571	0.582143	0.840129	0.78254	0.353571	0.297222	0.557937	0.163393	0.582143	0.793006	0.260417	0.0917659	1	0.427877	0.582143
