# Supplementary material for: Parental Preconception and Pre-Hatch Exposure to a Developmental Insult Alters Offspring’s Gene Expression and Epigenetic Regulations: An Avian Model
Source: Int J Mol Sci. 2023 Mar 6;24(5):5047. doi: 10.3390/ijms24055047 (PMC10003510; doi:10.3390/ijms24055047)
Supplement: Supplementary file 1 [file ijms-24-05047-s001.zip › Supp. S5 - Pre-hatch Correlation Matrix.xlsx]

## Sheet: R - value
						Pre-hatch - Spearman's correlation matrix R values
	miR-221	miR-29a	PKCb	DCX	FOS	MBD2	MBD3	MeCP2	SETDB1	SETDB2	CHRM2	CHRM3	SLC18A3	CREB	REST	SLC6A4
miR-221	1	0.840686	0.503297	0.767443	0.208461	0.625	0.182137	0.17033	0.275405	0.266094	0.369973	-0.207143	0.494505	0.413844	0.540773	0.371958
miR-29a	0.840686	1	0.492857	0.474227	0.0877646	0.215686	-0.0440165	0.0604396	0.00147276	0.16319	0.51067	0.0705882	0.512088	0.396171	0.382634	0.247313
PKCb	0.503297	0.492857	1	0.450836	0.0588596	0.4	0.328269	0.461538	0.18588	0.264286	0.396783	0.248352	0.482517	0.0609323	0.457552	0.143489
DCX	0.767443	0.474227	0.450836	1	0.616001	0.830836	0.410529	0.413311	0.324465	0.161846	0.630727	-0.0609872	0.192055	0.387243	0.215249	0.100776
FOS	0.208461	0.0877646	0.0588596	0.616001	1	0.519754	-0.486933	-0.080429	-0.0108583	-0.045478	0.181595	-0.272259	-0.193619	0.393579	0.110594	-0.426462
MBD2	0.625	0.215686	0.4	0.830836	0.519754	1	0.1708	0.428571	0.384049	0.173837	0.155911	-0.397059	0.139286	0.371779	0.361741	0.143174
MBD3	0.182137	-0.0440165	0.328269	0.410529	-0.486933	0.1708	1	0.463636	0.190909	-0.268893	0.161405	0.170214	0.376572	-0.266667	0.0637815	0.735566
MeCP2	0.17033	0.0604396	0.461538	0.413311	-0.080429	0.428571	0.463636	1	0.954896	0.688669	-0.160839	-0.538462	-0.0424242	0.366856	0.519252	0.62335
SETDB1	0.275405	0.00147276	0.18588	0.324465	-0.0108583	0.384049	0.190909	0.954896	1	0.691222	0.112701	-0.372094	0.0660066	0.441243	0.407362	0.390245
SETDB2	0.266094	0.16319	0.264286	0.161846	-0.045478	0.173837	-0.268893	0.688669	0.691222	1	-0.149785	-0.365644	0.175313	0.244657	0.388344	0.363369
CHRM2	0.369973	0.51067	0.396783	0.630727	0.181595	0.155911	0.161405	-0.160839	0.112701	-0.149785	1	0.744665	0.629263	0.173369	0.0375671	0.0242828
CHRM3	-0.207143	0.0705882	0.248352	-0.0609872	-0.272259	-0.397059	0.170214	-0.538462	-0.372094	-0.365644	0.744665	1	0.567857	-0.442244	-0.487936	-0.17881
SLC18A3	0.494505	0.512088	0.482517	0.192055	-0.193619	0.139286	0.376572	-0.0424242	0.0660066	0.175313	0.629263	0.567857	1	-0.00350263	-0.21978	-0.00704243
CREB	0.413844	0.396171	0.0609323	0.387243	0.393579	0.371779	-0.266667	0.366856	0.441243	0.244657	0.173369	-0.442244	-0.00350263	1	0.75523	-0.192905
REST	0.540773	0.382634	0.457552	0.215249	0.110594	0.361741	0.0637815	0.519252	0.407362	0.388344	0.0375671	-0.487936	-0.21978	0.75523	1	0.201723
SLC6A4	0.371958	0.247313	0.143489	0.100776	-0.426462	0.143174	0.735566	0.62335	0.390245	0.363369	0.0242828	-0.17881	-0.00704243	-0.192905	0.201723	1

## Sheet: p - value
						Pre-hatch - Spearman's correlation matrix p values
	miR-221	miR-29a	PKCb	DCX	FOS	MBD2	MBD3	MeCP2	SETDB1	SETDB2	CHRM2	CHRM3	SLC18A3	CREB	REST	SLC6A4
miR-221		5.20623e-05	0.0693772	0.00126249	0.419062	0.00863806	0.56815	0.578618	0.299491	0.299685	0.174295	0.457799	0.0888951	0.111739	0.0267959	0.155692
miR-29a	5.20623e-05		0.0644052	0.0651473	0.729124	0.390027	0.887879	0.849068	0.997782	0.528615	0.0451914	0.796678	0.0640775	0.129065	0.143508	0.37308
PKCb	0.0693772	0.0644052		0.10701	0.822031	0.125912	0.352686	0.134005	0.503975	0.340189	0.143233	0.391087	0.11541	0.831923	0.0877396	0.625076
DCX	0.00126249	0.0651473	0.10701		0.00981422	1.95418e-05	0.184873	0.181586	0.21802	0.530926	0.0103237	0.828866	0.509789	0.153173	0.437582	0.728795
FOS	0.419062	0.729124	0.822031	0.00981422		0.0225545	0.0935419	0.775262	0.965892	0.857791	0.4822	0.30531	0.504219	0.106107	0.662205	0.0885195
MBD2	0.00863806	0.390027	0.125912	1.95418e-05	0.0225545		0.574428	0.128092	0.128232	0.476624	0.536718	0.115624	0.62053	0.141677	0.153427	0.594442
MBD3	0.56815	0.887879	0.352686	0.184873	0.0935419	0.574428		0.154576	0.576535	0.393291	0.61431	0.637898	0.31789	0.398248	0.853961	0.0189396
MeCP2	0.578618	0.849068	0.134005	0.181586	0.775262	0.128092	0.154576		7.6698e-07	0.00798875	0.619183	0.0749519	0.918376	0.196417	0.059422	0.0195753
SETDB1	0.299491	0.997782	0.503975	0.21802	0.965892	0.128232	0.576535	7.6698e-07		0.00277731	0.687079	0.171619	0.823112	0.087956	0.105288	0.13495
SETDB2	0.299685	0.528615	0.340189	0.530926	0.857791	0.476624	0.393291	0.00798875	0.00277731		0.562862	0.148753	0.52909	0.3578	0.123274	0.165863
CHRM2	0.174295	0.0451914	0.143233	0.0103237	0.4822	0.536718	0.61431	0.619183	0.687079	0.562862		0.0013537	0.0181493	0.533977	0.894672	0.939314
CHRM3	0.457799	0.796678	0.391087	0.828866	0.30531	0.115624	0.637898	0.0749519	0.171619	0.148753	0.0013537		0.029744	0.114338	0.0669159	0.540503
SLC18A3	0.0888951	0.0640775	0.11541	0.509789	0.504219	0.62053	0.31789	0.918376	0.823112	0.52909	0.0181493	0.029744		0.996074	0.470298	0.991556
CREB	0.111739	0.129065	0.831923	0.153173	0.106107	0.141677	0.398248	0.196417	0.087956	0.3578	0.533977	0.114338	0.996074		0.00069139	0.470179
REST	0.0267959	0.143508	0.0877396	0.437582	0.662205	0.153427	0.853961	0.059422	0.105288	0.123274	0.894672	0.0669159	0.470298	0.00069139		0.434236
SLC6A4	0.155692	0.37308	0.625076	0.728795	0.0885195	0.594442	0.0189396	0.0195753	0.13495	0.165863	0.939314	0.540503	0.991556	0.470179	0.434236
